# Supplementary material for: Solution vs. gas phase relative stability of the choline/acetylcholine cavitand complexes
Source: Royal Society of Chemistry journal article supplement (doi:10.1039/c4cp05354k), 2015-01-01

## SUPPLEMENTARY INFORMATION (SI)

### SI-1 : Collision Induced Dissociation of the $\text{Ch}^+-2$ and the $\text{ACh}^+-2$ complexes

The thresholds for the appearance of the  $\text{Ch}^+$  and the  $\text{ACh}^+$  ions are estimated to 53.9V and 44.0V respectively

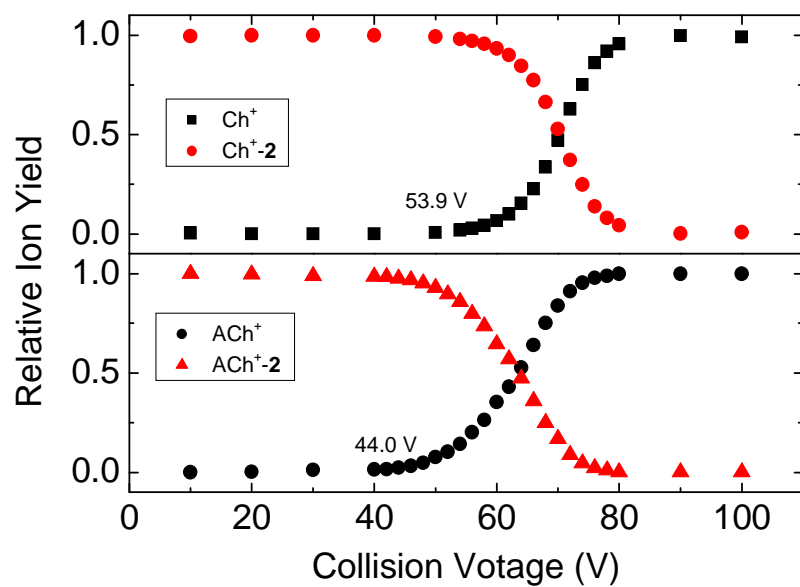

**SI-2 : Calculated structure of the  $\text{Ch}^+$ -1 complex**

(A) Presence of the counter ion

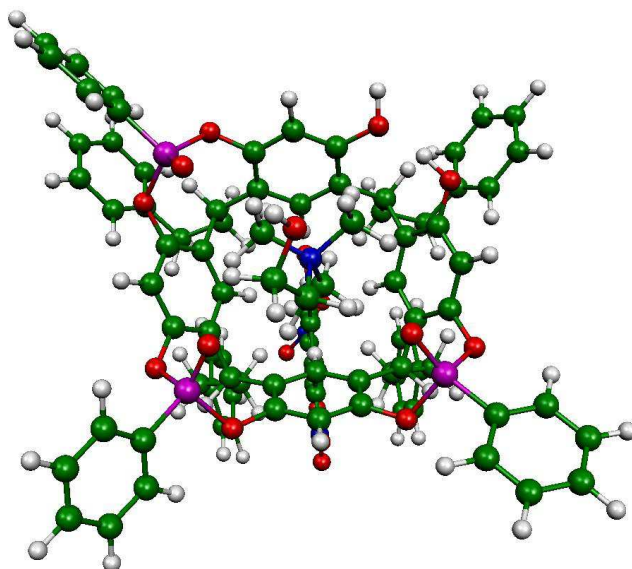

(B) Absence of the counter ion

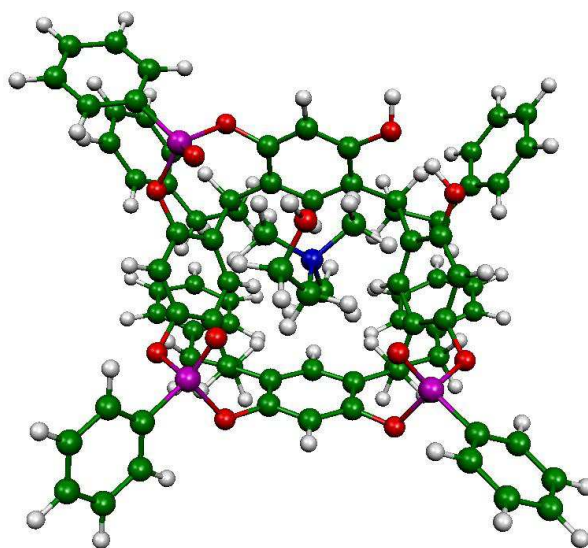

### SI-3 : Calculated structure of the ACh<sup>+</sup>-1 complex

(A) Presence of the counter ion

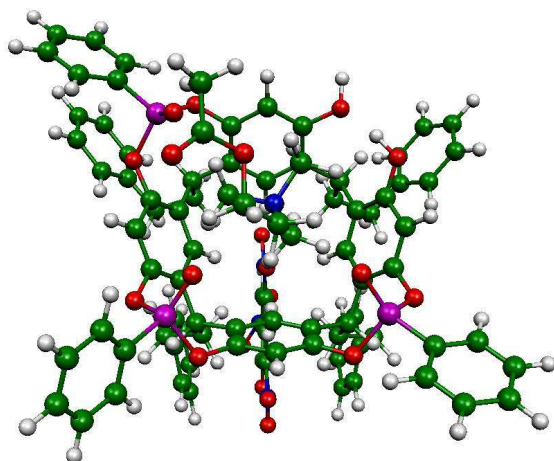

(B) Absence of the counter ion

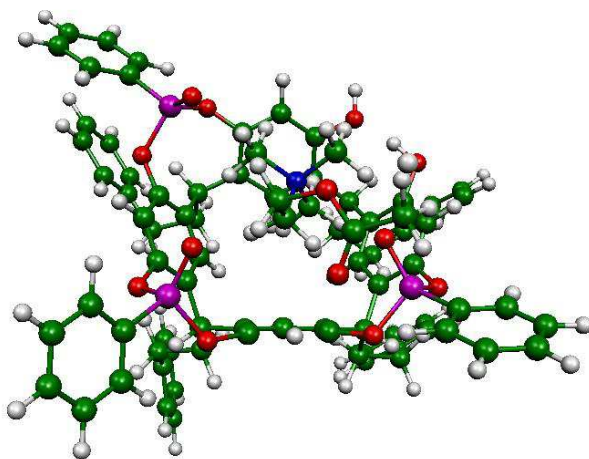

Supplement: c4cp05354k1.pdf [file c4cp05354k1.pdf]
